# Supplementary material for: Antimicrobial Compounds Produced by Vaginal Lactobacillus crispatus Are Able to Strongly Inhibit Candida albicans Growth, Hyphal Formation and Regulate Virulence-related Gene Expressions
Source: PubMed Central journal article supplement (PMC5378977; doi:10.3389/fmicb.2017.00564), 2017-04-04
Supplement: Image_1.pdf [file Image_1.pdf]

## Supplementary Material

# Antimicrobial Compounds Produced by Vaginal *Lactobacillus crispatus* Are Able to Strongly Inhibit *Candida albicans* Growth, Hyphal Formation and Regulate Virulence-related Gene Expressions

Shuai Wang, Qiangyi Wang, Ence Yang, Ling Yan, Tong Li\*, Hui Zhuang\*

\* Correspondence: Tong Li: [tongli08@vip.sina.com](mailto:tongli08@vip.sina.com), Hui Zhuang: [zhuangbmu@126.com](mailto:zhuangbmu@126.com)

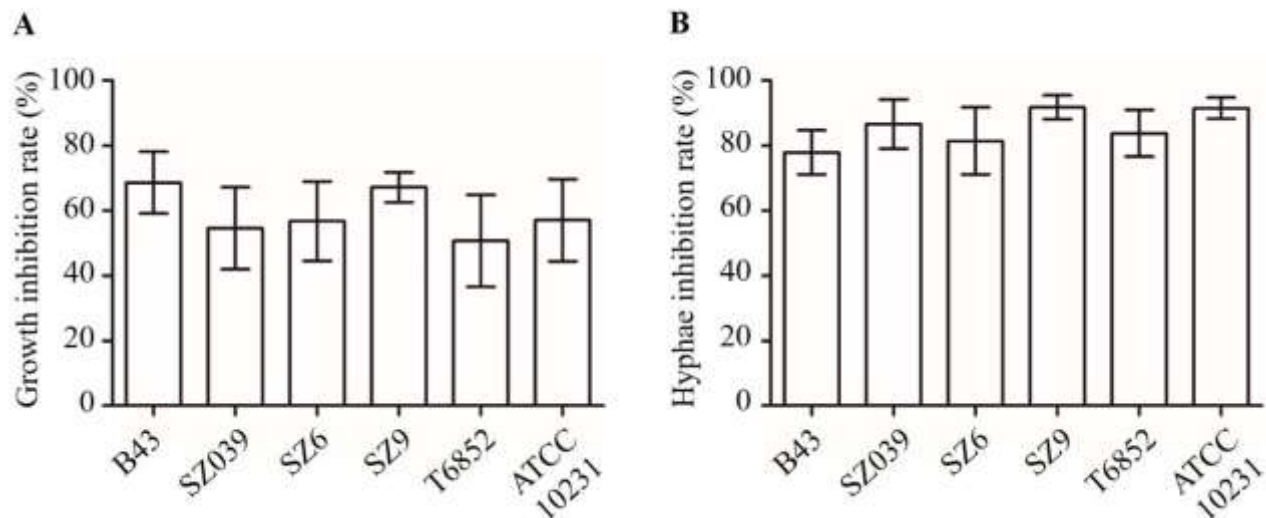

**Figure S1.** Inhibition of growth and hyphal formation of 6 *C. albicans* isolates by CFS from *L. crispatus* B145. (A) Growth inhibition rate (%), (B) Hyphae inhibition rate (%). *C. albicans* B43, SZ039, SZ6, SZ9, and T6852 were vaginal isolates. Growth inhibition rate (%) =  $(OD_{\text{control}} - OD_{\text{CFS}}) / OD_{\text{control}} \times 100$ , Hyphae inhibition rate (%) =  $(\text{Hyphae}\%_{\text{control}} - \text{Hyphae}\%_{\text{CFS}}) / \text{Hyphae}\%_{\text{control}} \times 100$ .
